# Supplementary material for: Human Placental-Specific Epipolymorphism and its Association with Adverse Pregnancy Outcomes
Source: PLoS One. 2009 Oct 19;4(10):e7389. doi: 10.1371/journal.pone.0007389 (PMC2760756; doi:10.1371/journal.pone.0007389)
Supplement: Table S2 — PCR primers and conditions for all assays. (0.03 MB XLS) [file pone.0007389.s010.xls]

## Sheet: Table S1
Table S2. PCR Primers and conditions
Primers for bisulfite pyrosequencing
Gene	Primer	Sequence (5' to 3')	Annealing temperature (°C)	Product length (bp)
EPHB4	Forward	GGYGAGGGTTTTTTAAATTTAGT	50	113
	Reverse	(5' biotinated)-AAAAACTCACCTTCCAAAACTAC
	Sequencing	GGYGAGGGTTTTTTAAAT
TUSC3	Forward	TAATTGGGTTTAGTAGTAGGATGGTT	50	218
	Reverse	(5' biotinated)-CAAAAAAAAAAACTAACAAAACATCC
	Sequencing	TTTAGGGTTAAAGGATTAT
WNT2	Forward	AAGTAATGAGTTGAGAATTATTTTTGGATT	50	195
	Reverse	(5' biotinated)-AAAACCTTTAAAAAAACTCCAAACC
	Sequencing	TTAGGGATTTGTTTGTTAG
MKRN3	Forward	TTTTTTGTTAATGTTTTGTTGGTGA	50	179
	Reverse	(5' biotinated)-CTTTTTTTATTCACTCCATCTTATATCTA
	Sequencing	TTTAGAAATTTTAGAAAATA
NOD2	Forward	TGATGTAGTTGTTGGGAGGATAGA	50	144
	Reverse	(5' biotinated)-TTACACACCAAACCTAAAACAACC
	Sequencing	TTGTTGGGAGGATAGAG
ID2	Forward	ATTTATTGTATTGTATTTTATTTATTATTTTAGTTGGGT	57	178
	Reverse	(5' biotinated)-ACTTCCCTTCRTCCCCATTAA
	Sequencing	ATTTATTATTTTAGTTGGGT
Ephb4	Forward	TAGATTTGGGGGGGTTAGGGTTT	50	135
	Reverse	(5' biotinated)-AACACCCCAAAAAAACTCACCTTCT
	Sequencing	GGGTTAGGGTTTTTTAAAT
Tusc3	Forward	GTTAGAGGTGAAAGTAAGGGGTTATTT	50	251
	Reverse	(5' biotinated)-AACAACCTCTCCTAACCAAAACCT
	Sequencing	GGTTATTTTTTGATGTTTG
Wnt2	Forward	TGTGTATTATTGGTTAGGAATTTTTTAAA	50	280
	Reverse	(5' biotinated)-AACCAATTCCCCAAACACTA
	Sequencing	TTTTTTTTATTTTTTAATAAAATT
Primers for BstUI pre-digestion PCR
Gene	Primer	Sequence (5' to 3')	Annealing temperature (°C)	Product length (bp)
ID2	Forward	CCAGCCCCGCACTTACTGT	56	226
	Reverse	GCGGCTTTTATCCGCACTC
TUSC3	Forward	GGTGAACCGGATGCTCTGTC	56	186
	Reverse	(5' biotinated)-CGGCAGGGCAGTGTCTCC
	Sequencing	GGGTCCCTCGCAAAG
Primers for Reverse Transcription PCR
Gene	Primer	Sequence (5' to 3')	Annealing temperature (°C)	Product length (bp)
TUSC3	Forward	AGTCTCCTCCTCTGCGTCCT	60	337
	Reverse	(5' biotinated)-TCAGCTGCTCTACTTTTTCAGC
	Sequencing	GGGTCCCTCGCAAAG
EPHB4	Forward	AGGAACATCACAGCCAGACC	60	303
	Reverse	CTGCACCAATCACCTCTTCA
WNT2	Forward	CTGTATCAGGGACCGAGAGG	60	475
	Reverse	TGACTGCAGAACACCAGGAG
Primers for bisulfite cloning PCR
Gene	Primer	Sequence (5' to 3')	Annealing temperature (°C)	Product length (bp)
TUSC3	Forward	TAATTGGGTTTAGTAGTAGGATGGTT	50	218
	Reverse	CAAAAAAAAAAACTAACAAAACATCC
EPHB4	Forward	GGYGAGGGTTTTTTAAATTTAGT	50	234
	Reverse	ATCCRAAATATTTAAAACTACAATA
WNT2	Forward	AAGTAATGAGTTGAGAATTATTTTTGGATT	50	195
	Reverse	AAAACCTTTAAAAAAACTCCAAACC
Reaction condition and thermal profile for all PCR
	Final conc.
10X HotStarTaq Buffer	1X	Initial denaturation: 95°C	10 min
MgCl2	1.25mM	Denaturation: 95°C	40 sec
dNTP	200mM	Annealing: 50~60°C	40 sec x 40 cycles
Forward primer	200nM	Extension: 72°C	40 sec
Reverse primer	200nM	Final extension: 72°C	7 min
HotStarTaq	0.04U
Total reaction volume	25ml
